# Supplementary material for: A critical role for Apc in hematopoietic stem and progenitor cell survival
Source: PubMed Central journal article supplement — J Exp Med. 2008 Sep 1;205(9):2163–75. doi: 10.1084/jem.20080578 (PMC2526209; doi:10.1084/jem.20080578), 2008-09-01
Supplement: jem.20080578_9.pdf [file jem.20080578_9.pdf]

Qian et al., <http://www.jem.org/cgi/content/full/jem.20080578/DC1>

**Apc mutant mice.** *Mx1-Cre<sup>+</sup>Apc<sup>fl/fl</sup>* mice, generated by crossing *Apc<sup>fl/fl</sup>* mice (1) with *Mx1-Cre* transgenic mice (2), were crossed with *Apc<sup>fl/fl</sup>* mice to generate *Mx1-Cre<sup>+</sup>Apc<sup>fl/fl</sup>*, *Mx1-Cre<sup>-</sup>Apc<sup>fl/fl</sup>*, *Mx1-Cre<sup>+</sup>Apc<sup>fl/+</sup>*, and *Mx1-Cre<sup>-</sup>Apc<sup>fl/+</sup>* mice. Genotyping was performed by PCR analysis of tail DNA using primers P3 (5'-GTTCTGTATCATGGAAAGATAGGTGGTC-3'), P4 (5'-CACTCAAACGCTTTTGAGGGTTGATTC-3'), and P5 (5'-GAGTACGGGGTCTGTCTCAGTGAA-3'; reference 1). To induce deletion of exon 14 of *Apc*, mice were injected i.p. with 6–10 µg/gram body weight of pI-pC two or three times every 2 d. The efficiency of deletion in hematopoietic cells was verified by PCR using primers P3 and P4. The expression of *Apc* in HSCs after induction of *Apc* deletion was analyzed by qRT-PCR using primers A (5'-ACAAGACGGCAGCTGGAGTATGAA-3') and B (5'-TGGATCCTG-GCTATTCTCGCTGT-3'). Mice at 2 mo of age or older were used for experiments. The chimeric mice were analyzed 2 mo after transplantation.

**Histology and peripheral blood analyses.** Sternum obtained from mice were fixed and decalcified in Cal-Rite (Richard-Allan Scientific), embedded, sectioned, and stained with hematoxylin and eosin. Blood smears were stained in May-Gruenwald-Giemsa. Peripheral blood was collected by tail bleeding. The WBC, red blood cell, and platelet counts, hemoglobin level, and WBC differentials were determined with a Hemavet counter (CDC Technologies, Inc.).

**CAFC assay.** The CAFC assay was performed as previously described (3). In brief, FBMD-1 stromal cells were cultured in 96-well plates for 10–14 d to form confluent monolayers. Total BM cells were isolated from *Mx1-Cre<sup>+</sup>Apc<sup>fl/fl</sup>* or *Mx1-Cre<sup>-</sup>Apc<sup>fl/fl</sup>* mice 4 d after two pI-pC injections and plated at dilutions of 81,000, 27,000, 9,000, 3,000, 1,000, and 333 cells per well with 20 replicate wells onto the monolayer of FBMD-1 stromal cells. Cobblestone areas, defined as a colony of at least five cells underneath the stroma, were scored at day 35. The frequency of CAFC was calculated using the maximum likelihood method.

**Homing Assays.** This experiment was performed as previously described (4). At 4 d after induction, the *Apc* mutant and control BM cells were isolated and labeled with CFSE (Invitrogen) as per the manufacturer's instructions. The labeled *Apc* control or *Apc* mutant BM cells were transplanted into lethally irradiated recipient mice ( $2 \times 10^6$  or  $6 \times 10^6$  per mouse, respectively) by retroorbital injection. The proportion of CFSE-labeled cells in BM of recipient mice was examined by flow cytometry, 6 h after injection. PCR analysis of genomic DNA from the BM cells was performed to confirm deletion of the floxed *Apc* alleles.

## REFERENCES

1. Shibata, H., K. Toyama, H. Shioya, M. Ito, M. Hirota, S. Hasegawa, H. Matsumoto, H. Takano, T. Akiyama, K. Toyoshima, et al. 1997. Rapid colorectal adenoma formation initiated by conditional targeting of the *Apc* gene. *Science*. 278:120–123. doi:10.1126/science.278.5335.120
2. Kuhn, R., F. Schwenk, M. Aguet, and K. Rajewsky. 1995. Inducible gene targeting in mice. *Science*. 269:1427–1429. doi:10.1126/science.7660125
3. de Haan, G., W. Nijhof, and G. Van Zant. 1997. Mouse strain-dependent changes in frequency and proliferation of hematopoietic stem cells during aging: correlation between lifespan and cycling activity. *Blood*. 89:1543–1550.
4. Zhang, J., J.C. Grindley, T. Yin, S. Jayasinghe, X.C. He, J.T. Ross, J.S. Haug, D. Rupp, K.S. Porter-Westpfahl, L.M. Wiedemann, et al. 2006. PTEN maintains haematopoietic stem cells and acts in lineage choice and leukaemia prevention. *Nature*. 441:518–522. doi:10.1038/nature04747

**Table S1.** Primers used in qRT-PCR analysis

| Primer name | Sequence                 |
|-------------|--------------------------|
| Birc5-f     | TCTGGCAGCTGTACCTCAAGAACT |
| Birc5-r     | CCCAGCCTCCAATTCCTTAAAGC  |
| Cdkn1a-f    | ACCAGCCTGACAGATTCTA      |
| Cdkn1a-r    | TGACCCACAGCAGAAGAG       |
| Myc-f       | CTGTTTGAAGGCTGGATT       |
| Myc-r       | TCGAGGTCATAGTTCCTGTT     |
| Cdkn1b-f    | GTGGACCAAATGCCTGACTCGT   |
| Cdkn1b-r    | GGGCTTCTGGGCGTCTGCT      |
| Bcl2-f      | TTGTGGCCTTCTTTGAGTTCGGTG |
| Bcl2-r      | CTTCAGAGACAGCCAGGAGAAATC |
| Tp53-f      | AAAGGATGCCATGCTACAGAGGA  |
| Tp53-r      | ATGGGAGCTAGCAGTTTGGGCTTT |
| Gata1-f     | GCACTAACTGTCAAACGACCAC   |
| Gata1-r     | CGTCTGGATTCCATCTTTCC     |
| Myb-f       | GAATCATTTACCAGGCACAC     |
| Myb-r       | CCAGTGGTTCCTGATAGCAT     |
| Gata2-f     | CAACCCTTACTACGCCAAC      |
| Gata2-r     | CTGTGCAACAAGTGTGGTC      |
| Bmi1-f      | ACCTGGAGAAGAAATGGCCCACTA |
| Bmi1-r      | AGTCACTTCCAGCTCTCCAGCAT  |
| Mcl1-f      | GGTGCCTTTGTGGCCAAACACTTA |
| Mcl1-r      | ACGTGGAAGAACTCCACAAACCCA |
| Hoxb4-f     | GCACGGTAAACCCCAATTA      |
| Hoxb4-r     | GGCAACTGTGGTCTTTTTT      |
| Ccnd1-f     | TGCTGCAAAATGGAAGTCTTCTGG |
| Ccnd1-r     | TACCATGGAGGGTGGGTTGGAAAT |
| Bcl2l1-f    | AAGCGTAGACAAGGAGATGCAGGT |
| Bcl2l1-r    | CTGCTGCATTGTTCCCGTAGAGAT |
| Tnfrsf1a-f  | TCAGGCAGTGTCTCAGTTGCAAGA |
| Tnfrsf1a-r  | ACTGGTTCCTTACAGCCACACA   |

**Table S2.** Mean threshold cycle (C<sub>t</sub>) value for each gene in qRT-PCR analysis

| Gene            | Mean Ct value                                 |                                               |
|-----------------|-----------------------------------------------|-----------------------------------------------|
|                 | <i>Mx1-Cre<sup>-</sup>Apc<sup>fl/fl</sup></i> | <i>Mx1-Cre<sup>+</sup>Apc<sup>fl/fl</sup></i> |
| <i>Hprt</i>     | 35.13911206                                   | 37.51221983                                   |
| <i>Ccnd1</i>    | 36.01570817                                   | 37.50281217                                   |
| <i>Cdkn1b</i>   | 37.84073444                                   | 42.02595556                                   |
| <i>Cdkn1a</i>   | 31.01984411                                   | 34.02924311                                   |
| <i>Myc</i>      | 27.726358                                     | 30.87373056                                   |
| <i>Myb</i>      | 26.31670022                                   | 29.42454544                                   |
| <i>Bmi1</i>     | 30.55012544                                   | 33.39295278                                   |
| <i>Gata2</i>    | 28.78074422                                   | 31.79048467                                   |
| <i>Gata1</i>    | 33.16550728                                   | 35.28810883                                   |
| <i>Hoxb4</i>    | 34.23637756                                   | 36.65977617                                   |
| <i>Tnfrsf1a</i> | 29.11553489                                   | 32.40085978                                   |
| <i>Mcl1</i>     | 28.58722011                                   | 31.69094411                                   |
| <i>Tp53</i>     | 32.02020944                                   | 33.55653322                                   |
| <i>Birc5</i>    | 34.871307                                     | 36.40605422                                   |
| <i>Bcl2l1</i>   | 34.28690556                                   | 36.86379217                                   |
| <i>Bcl2</i>     | 33.47593678                                   | 36.42065089                                   |
